# Supplementary material
Source: Springer Nature journal article supplement (https://www.springermedizin.de/resource/supplementary/12943_2012_1070_MOESM4_ESM.pdf/9552220)

**a**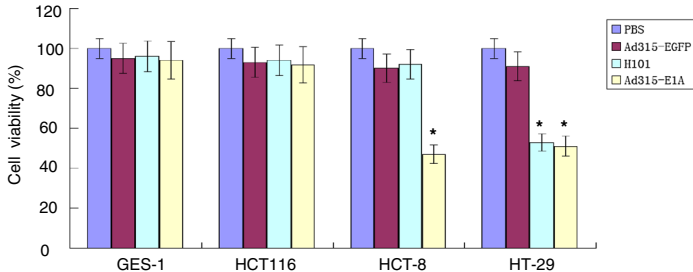**b**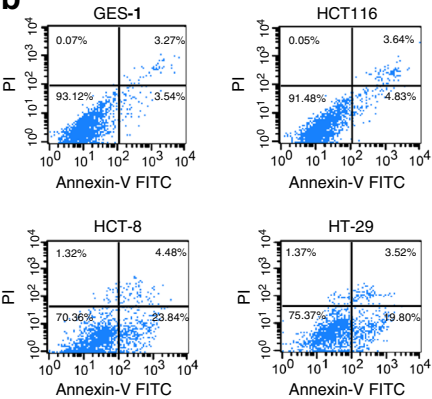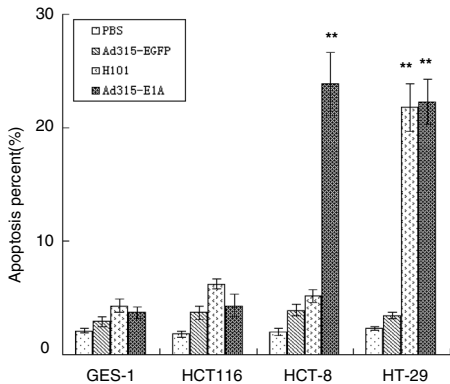

Supplement: MOESM4 [file 9552220]
